# Supplementary material
Source: Springer Nature journal article supplement (https://www.springermedizin.de/resource/supplementary/12968_2011_2002_MOESM2_ESM.pdf/9581106)

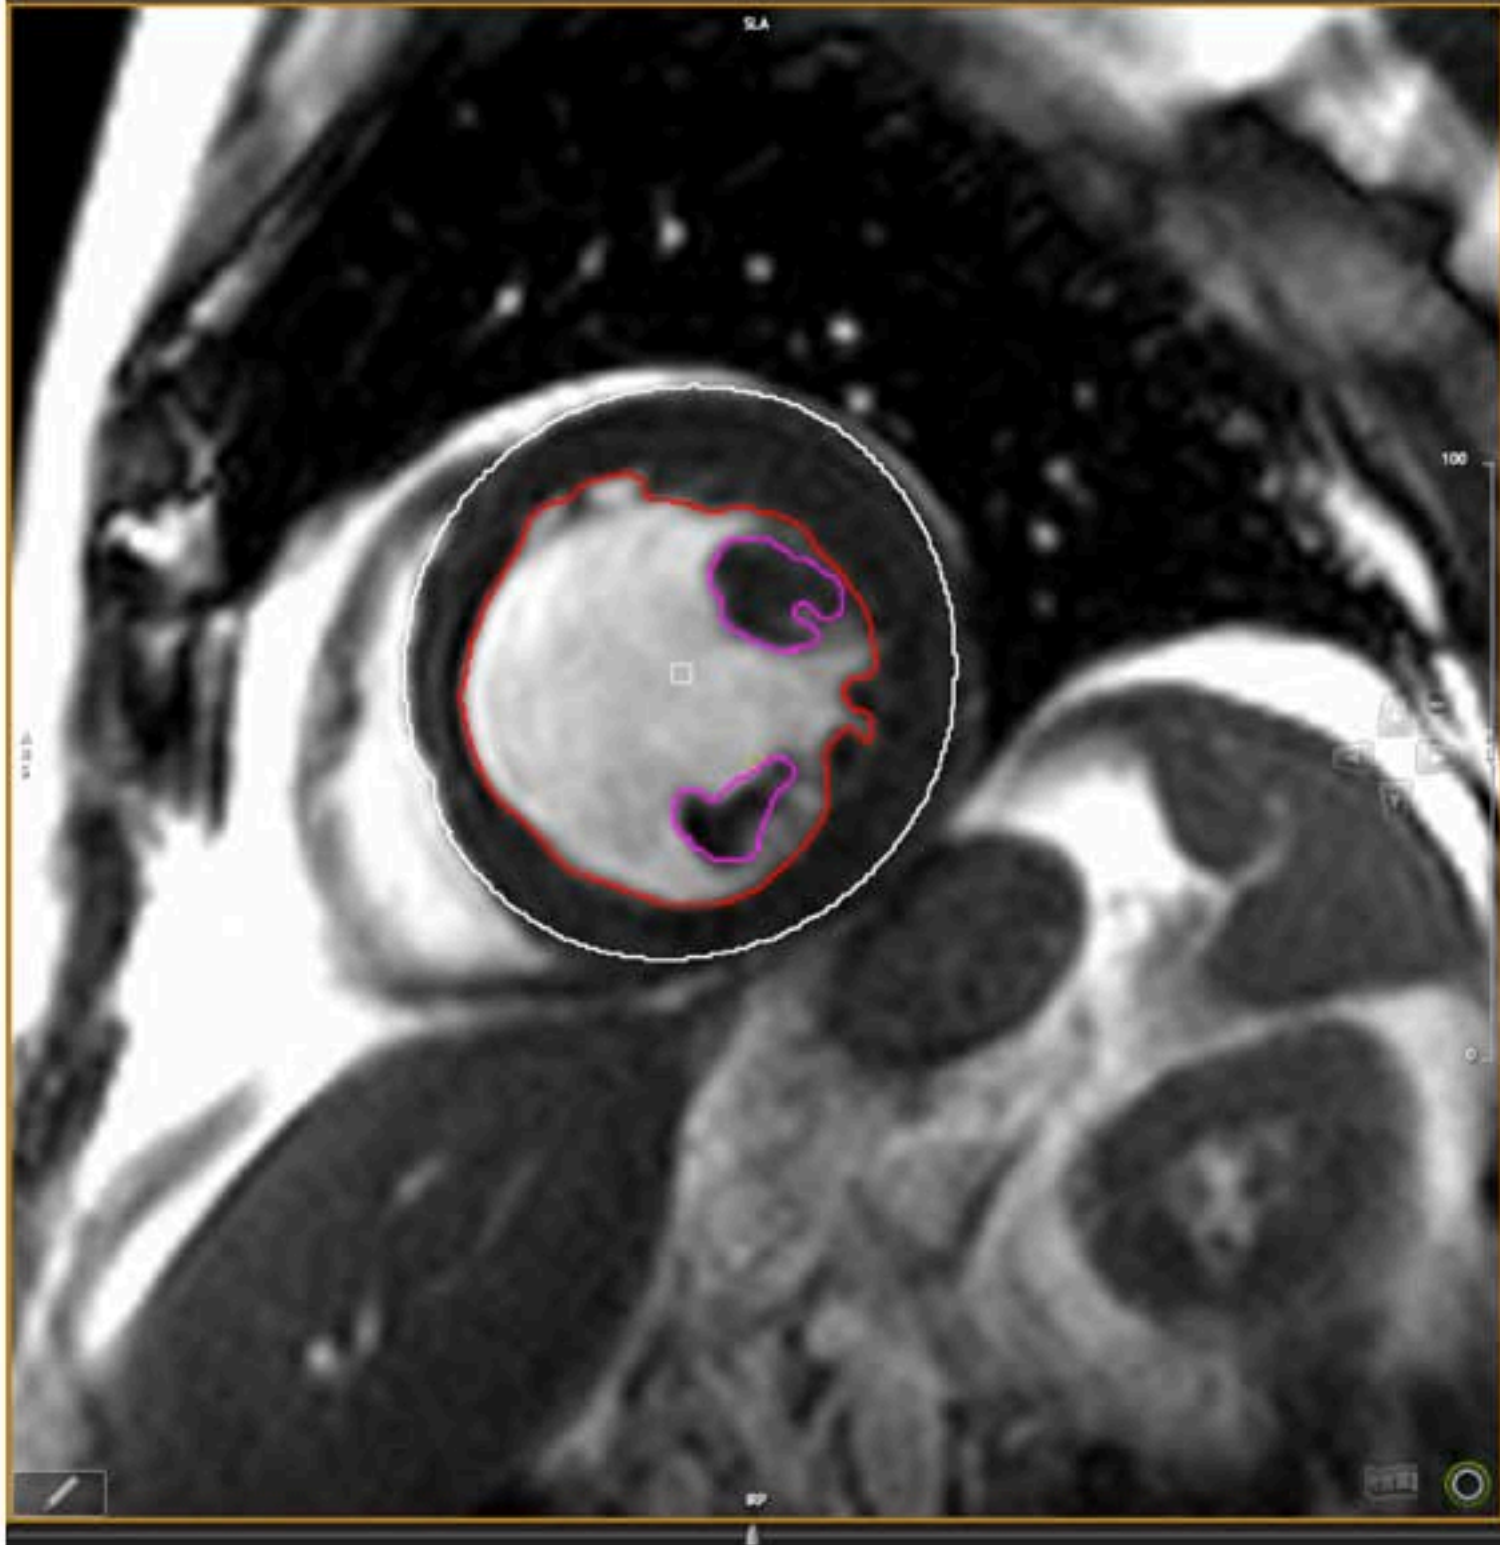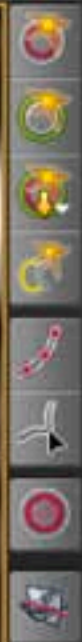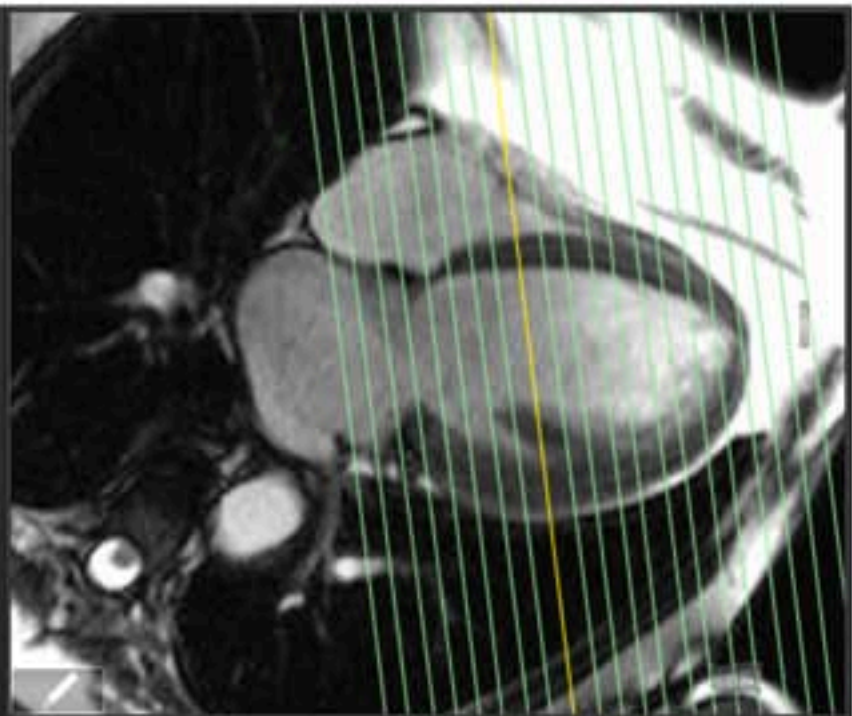

Disable Warning Messages

A row of icons including a gear, a red waveform, a yellow warning icon, and a blue shield icon.

Reference

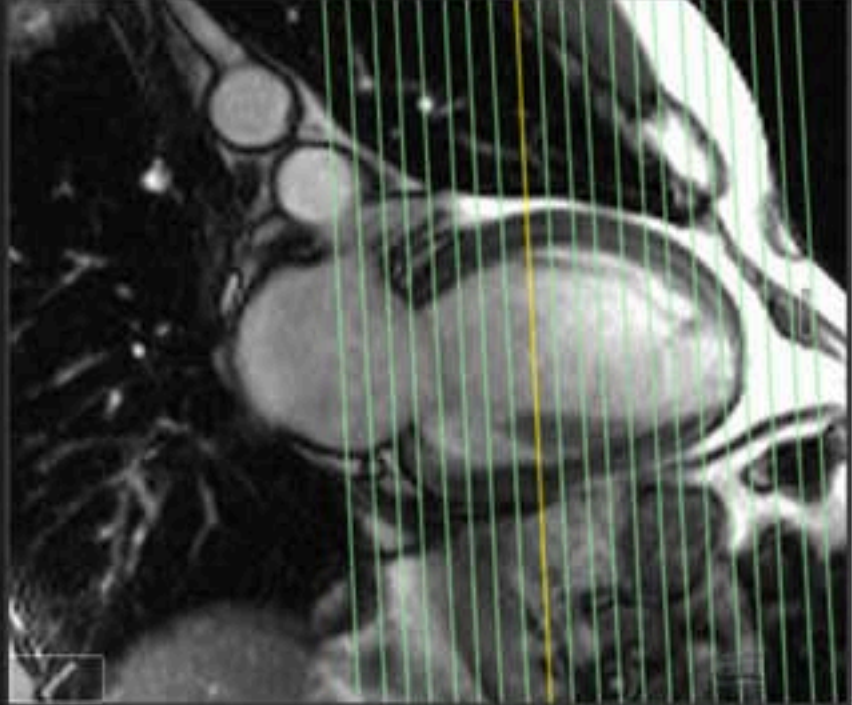

Supplement: MOESM2 [file 9581106]
